# Supplementary material for: Chromosomal Mapping of Repetitive DNAs in the Grasshopper Abracris flavolineata Reveal Possible Ancestry of the B Chromosome and H3 Histone Spreading
Source: PubMed Central journal article supplement (PMC3694960; doi:10.1371/journal.pone.0066532), 2013-06-27

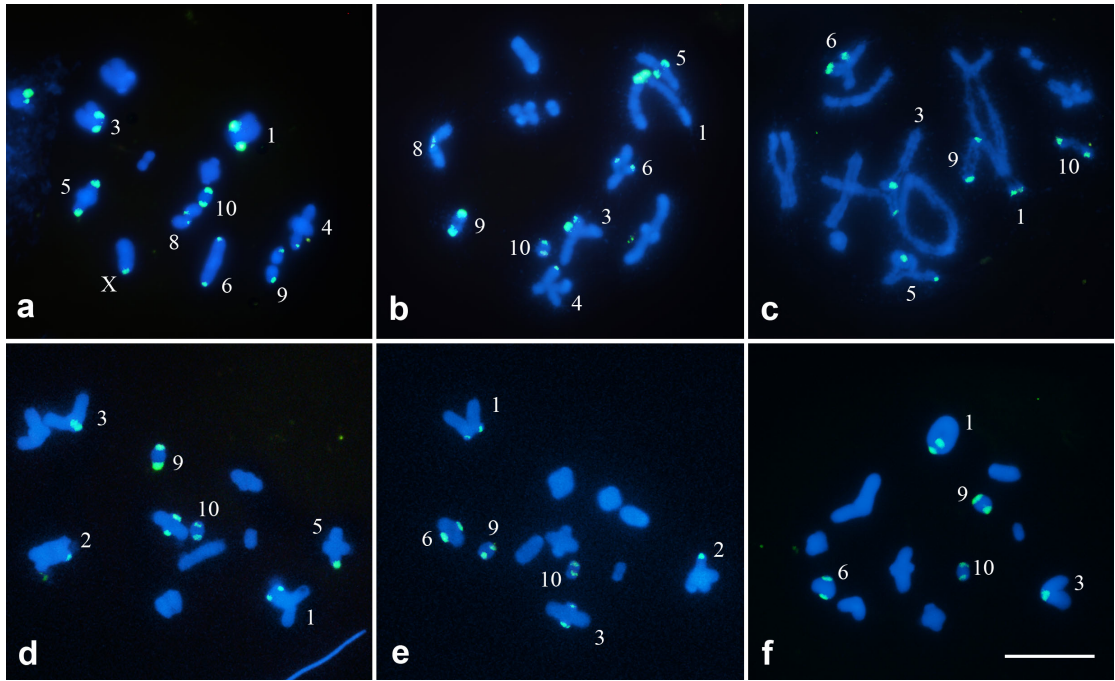

Supplement: pone.0066532.s001.pdf [file pone.0066532.s001.pdf]
