# Supplementary material for: Chromosomal Mapping of Repetitive DNAs in the Grasshopper Abracris flavolineata Reveal Possible Ancestry of the B Chromosome and H3 Histone Spreading
Source: PubMed Central journal article supplement (PMC3694960; doi:10.1371/journal.pone.0066532), 2013-06-27
Supplement: pone.0066532.s004.pdf [file pone.0066532.s004.pdf]

| <b>Chromosome pair</b> | <b>C-positive blocks</b> | <b>18S rDNA</b> | <b>H3 histone</b> | <b><i>C<sub>0</sub>t-1 DNA</i></b> |
|------------------------|--------------------------|-----------------|-------------------|------------------------------------|
| 1                      | 11,40%                   | 7,40%           | 11,83%            | 14,00%                             |
| 3                      | 18,40%                   | 8,96%           | 17,13%            | 23,57%                             |
| 5                      | 19,4%                    | 7,10%           | 17,85%            | 21,00%                             |
| 6                      | 23,80%                   | 10,63%          | 22,58%            | 26,85%                             |
| 9                      | 30,70%                   | 16,90%          | 37,50%            | 58,60%                             |
